# Supplementary figures and images for: Detecting weak signals from interfaces by high accuracy phase-resolved SFG spectroscopy
Source: Royal Society of Chemistry journal article supplement (doi:10.1039/c8cp04239j), 2018-01-01

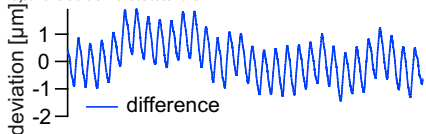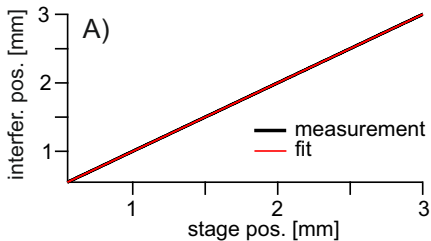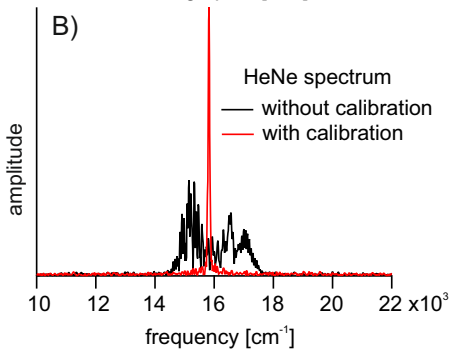

Supplement: c8cp04239j3.pdf [file c8cp04239j3.pdf]
